# Supplementary material for: Prevalence and Clinical Significance of Residual or Reconverted Red Bone Marrow on Knee MRI
Source: MDPI journal article supplement (doi:10.3390/diagnostics11091531), 2021-08-25
Supplement: s1 [file s1]

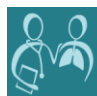

Supplement Figure S1. Participants flow chart.

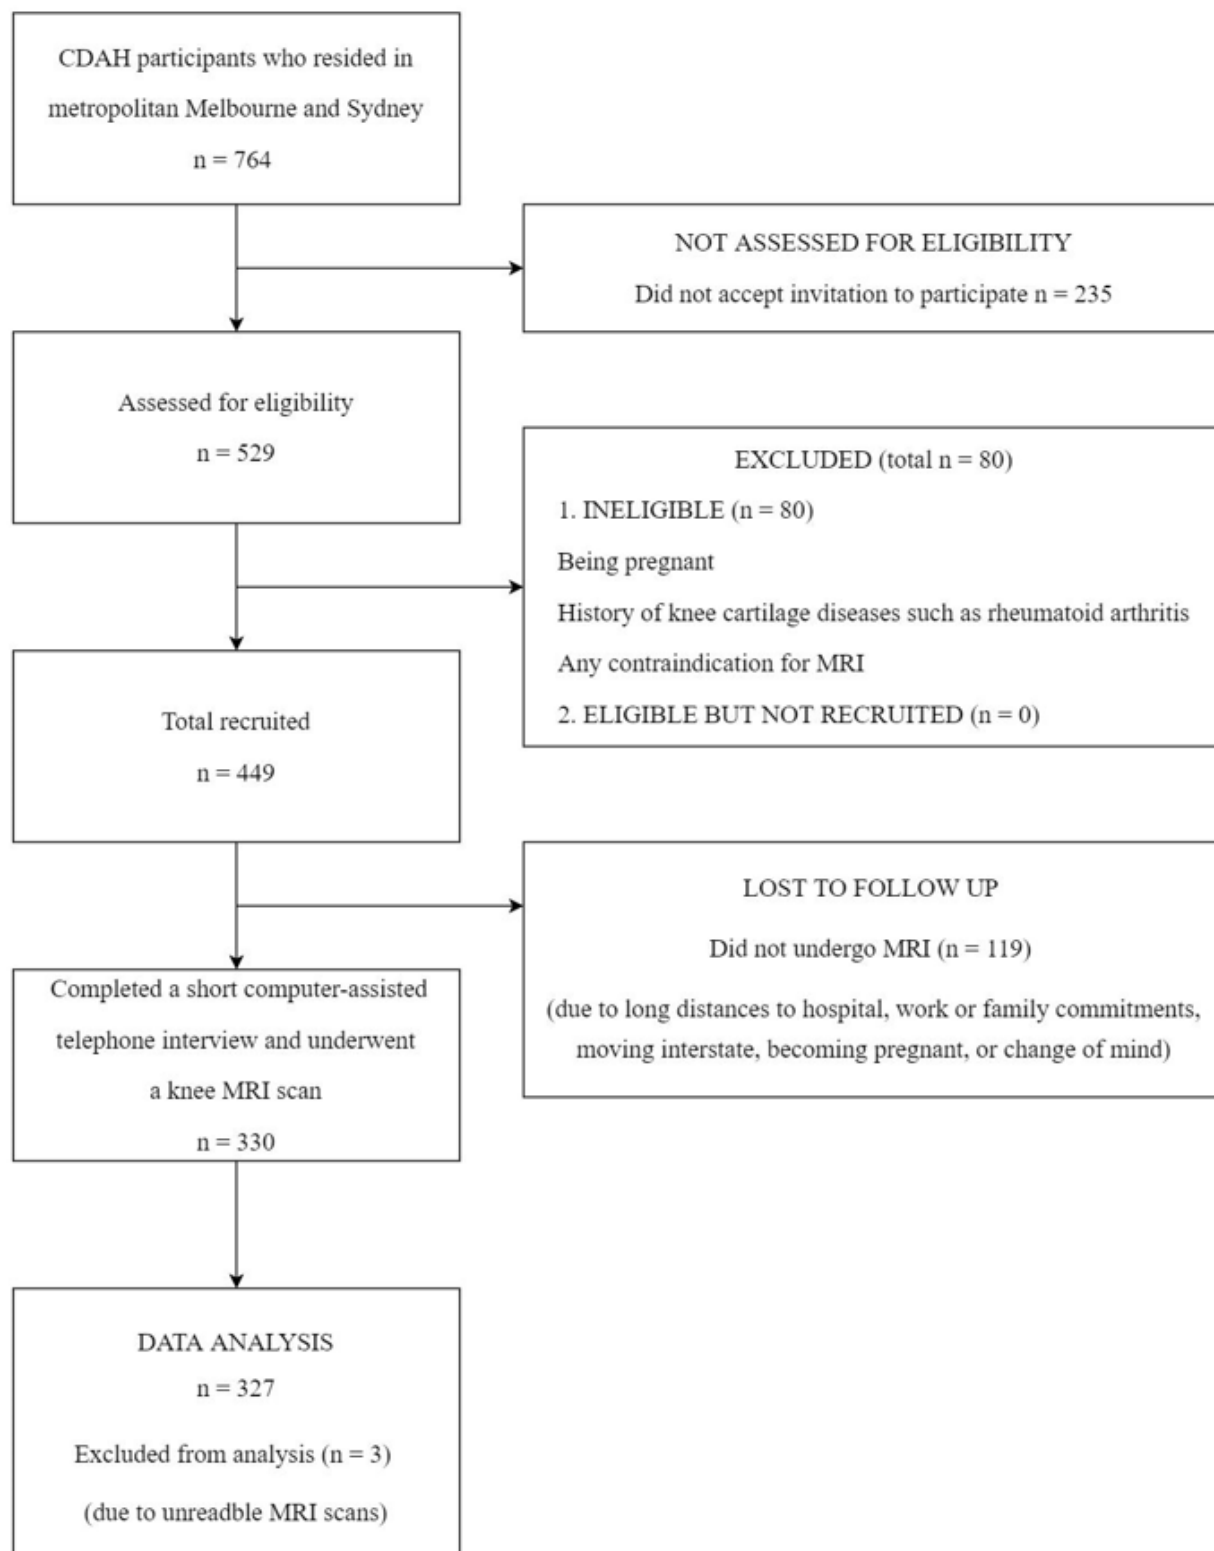

CDAH: Childhood Determinants of Adult Health; MRI: magnetic resonance imaging

**Supplement Table S1.** Longitudinal associations of definite residual or reconverted red bone marrow with incident knee symptoms in young female adults

|                                                                   | Univariable PR (95% CI) | Multivariable* PR (95% CI) |
|-------------------------------------------------------------------|-------------------------|----------------------------|
| Predictor variable: RBM at CDAH-knee cartilage study (yes/no)     |                         |                            |
| Outcome variable: incident WOMAC symptom at CDAH-3 study (yes/no) |                         |                            |
| WOMAC pain (yes)                                                  | 0.40 (0.05 to 2.55)     | 0.41 (0.06 to 2.59)        |
| WOMAC stiffness (yes)                                             | 1.48 (0.64 to 3.40)     | 1.11 (0.41 to 2.98)        |
| WOMAC dysfunction (yes)                                           | 0.59 (0.15 to 2.31)     | 0.90 (0.26 to 3.19)        |

Results are shown in prevalence ratio (PR) (95% confidence interval). **Bold** indicates statistical significance of  $P < 0.05$ . \*Multivariable analysis adjusted for age, BMI and knee injury.
